# Supplementary material for: Predictive Modeling of Soft Stretchable Nanocomposites Using Recurrent Neural Networks
Source: MDPI journal article supplement (doi:10.3390/polym14235290), 2022-12-03
Supplement: s1 [file s1]

# Supplementary Materials: Predictive Modeling of Soft Stretchable Nanocomposites Using Recurrent Neural Networks

Josué García-Ávila <sup>1,2</sup>, Diego de Jesus Torres Serrato <sup>1,3</sup>, Ciro. A. Rodriguez <sup>1,4</sup>, Adriana Vargas Martínez <sup>1,4</sup>, Erick Ramírez Cedillo <sup>1,4,5,\*</sup> and J. Israel Martínez-López <sup>1,4,5,6,\*</sup>

- <sup>1</sup> Tecnológico de Monterrey, Escuela de Ingeniería y Ciencias, Monterrey 64849, Mexico; garcia.josue@tec.mx (J.G.-Á.); a00826986@tec.mx (D.d.J.T.S.); ciro.rodriguez@tec.mx (C.A.R.); adriana.vargas.mtz@tec.mx (A.V.M.)
- <sup>2</sup> Department of Mechanical Engineering, Stanford University, Stanford, CA 94305-2004, USA; jgarciaa@stanford.edu
- <sup>3</sup> DTU Nanolab, National Centre for Nano Fabrication and Characterization, Technical University of Denmark, 2800 Kgs. Lyngby, Denmark; s222362@dtu.dk
- <sup>4</sup> Laboratorio Nacional de Manufactura Aditiva y Digital MADiT, Apodaca 66629, NL, Mexico;
- <sup>5</sup> 3D Factory, Ramon Treviño 1109, Monterrey 64580, Mexico
- <sup>6</sup> Centro de Investigación Numérica, 5 de mayo 912 Oriente, Monterrey 64000, NL, Mexico
- \* Correspondence: erickramce@tec.mx (E.R.C.); israel.mtz@tec.mx (J.I.M.-L.)

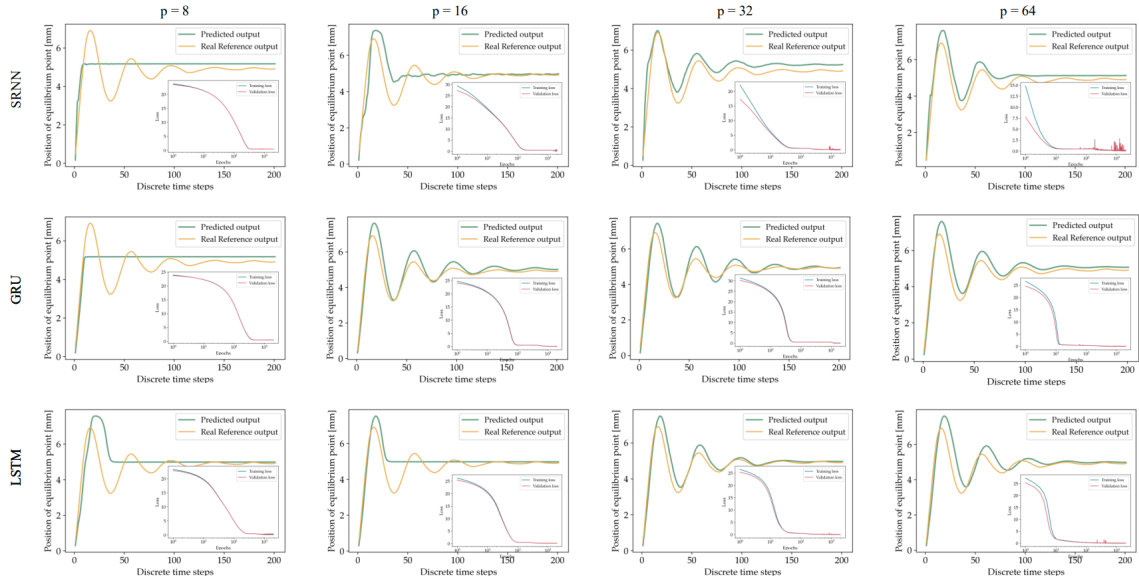

**Figure S1.** Predicted and real reference outputs of the SRNN, GRU, and LSTM architectures with their training, and validation losses for different number of units.
